# Supplementary material for: Synthesis of highly substituted tetrahydroquinolines using ethyl cyanoacetate via aza-Michael–Michael addition
Source: Royal Society of Chemistry journal article supplement (doi:10.1039/d0ra01264e), 2020-01-01
Supplement: d0ra01264e1.pdf [file d0ra01264e1.pdf]

### Synthesis of highly substituted tetrahydroquinolines using ethyl cyanoacetate via aza-Michael-Michael addition

A three-component cascade reaction of 2-alkenyl aniline, aldehydes, and ethyl cyanoacetate mediated by DBU to synthesize highly substituted 1,2,3,4-tetrahydroquinolines. The reaction proceeded through the Knoevenagel condensation of ethyl cyanoacetate with aldehydes followed by the aza-Michael-Michael addition with 2-alkenyl anilines to prepare the tetrahydroquinoline scaffolds.

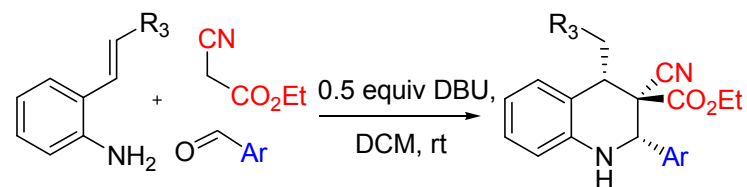

One pot -three component  
No metals or strong oxidants  
Simple reaction conditions  
Versatile to different  
Michael Acceptors

dr up to 93:7  
yields upto 96%,  
27 examples
